# Supplementary material for: The epitaxial growth of lead phthalocyanine on copper halogen compounds as the origin of templating effects
Source: Royal Society of Chemistry journal article supplement (doi:10.1039/c4ta00332b), 2014-01-01
Supplement: c4ta00332b1.pdf [file c4ta00332b1.pdf]

**Supplementary information for:**

**The epitaxial growth of lead-phthalocyanine on copper halogen  
compounds as the origin of templating effects**

*Tae-Min Kim,<sup>a</sup> Hyo Jung Kim,<sup>b</sup> Hyun-Sub Shim,<sup>a</sup> Min-Soo Choi,<sup>a</sup> Ji Whan Kim,<sup>a</sup> and Jang-Joo  
Kim<sup>a,\*</sup>*

<sup>a</sup> Department of Materials Science and Engineering and the Center for Organic Light  
Emitting Diode, Seoul National University, Seoul 151-744, South Korea

<sup>b</sup> Department of Organic Material Science and Engineering, College of Engineering, Pusan  
National University, Busan 609-735, South Korea

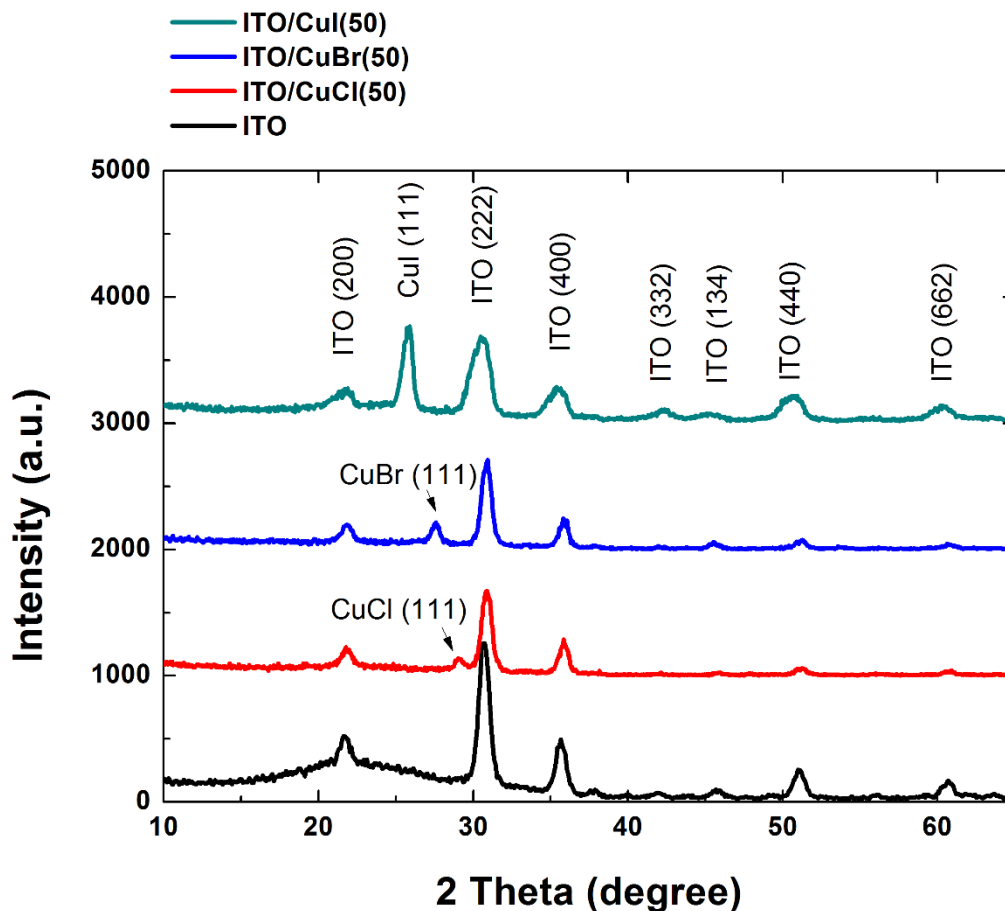

**Figure S1.** The X-ray diffraction profiles of ITO (black), ITO/CuCl (50 nm) (red), ITO/CuBr (50 nm) (blue), ITO/CuI (50 nm) (green). X-ray diffraction (XRD) measurements were done by D8 Advance diffractometer (Bruker) using Cu K $\alpha$  radiation at incident angle of 1°. The films were deposited on ITO substrates.
